# Supplementary material
Source: Frontiers journal article supplement (https://www.frontiersin.org/articles/515086)
Supplement: Data_Sheet_1.pdf [file Data_Sheet_1.pdf]

## Survey of property owners in Halifax Regional Municipality – Beech leaf mining weevil

The purpose of this survey is to determine the impact of the beech leaf mining weevil on American beech trees and on HRM residents who have beech trees on their property.

It should take only a few minutes to complete and is totally voluntary. Information provided on tree mortality and costs of removing trees will be analyzed and may be published but the identity of all respondents will remain confidential. Note: if you do not wish to share information on the costs of tree removal please leave that question (#4) unanswered.

1. Do you have any American beech trees (live, dead, or cut and removed within the last 5 years) on your property? Yes \_\_\_\_\_ No \_\_\_\_\_

2. If the answer to Q. 1 is yes, how many of your beech trees are:

- a) still alive and appear healthy (lots of foliage, full green crown) \_\_\_\_\_?
- b) alive but the trees appear unhealthy, e.g., thin crown \_\_\_\_\_?
- c) dead and still standing (no green leaves visible this past spring or summer) \_\_\_\_\_?
- d) dead and cut down and removed in the last 5 years \_\_\_\_\_?

3. In what year did you first notice damage to the leaves on your beech trees \_\_\_\_\_? (Please see images of typical damage by the beech leaf-mining attached)

4. If you have had to have dead or dying beech trees cut and removed on your property, how much did that cost (to the nearest \$100) \_\_\_\_\_?

5. Will you allow us to measure the diameter of your beech trees (live or stumps)? If so, please provide your contact information:

Name \_\_\_\_\_ Phone # or email \_\_\_\_\_

Address \_\_\_\_\_

Thank you for your time. Please return the survey by email, fax or mail to:

Dr. Jon Sweeney, Natural Resources Canada, Canadian Forest Service, PO Box 4000, Fredericton, NB, E3B5P7, [jon.sweeney@canada.ca](mailto:jon.sweeney@canada.ca), cell: 506 261 0340; office: 506 452 3499; fax 506 452 3525.

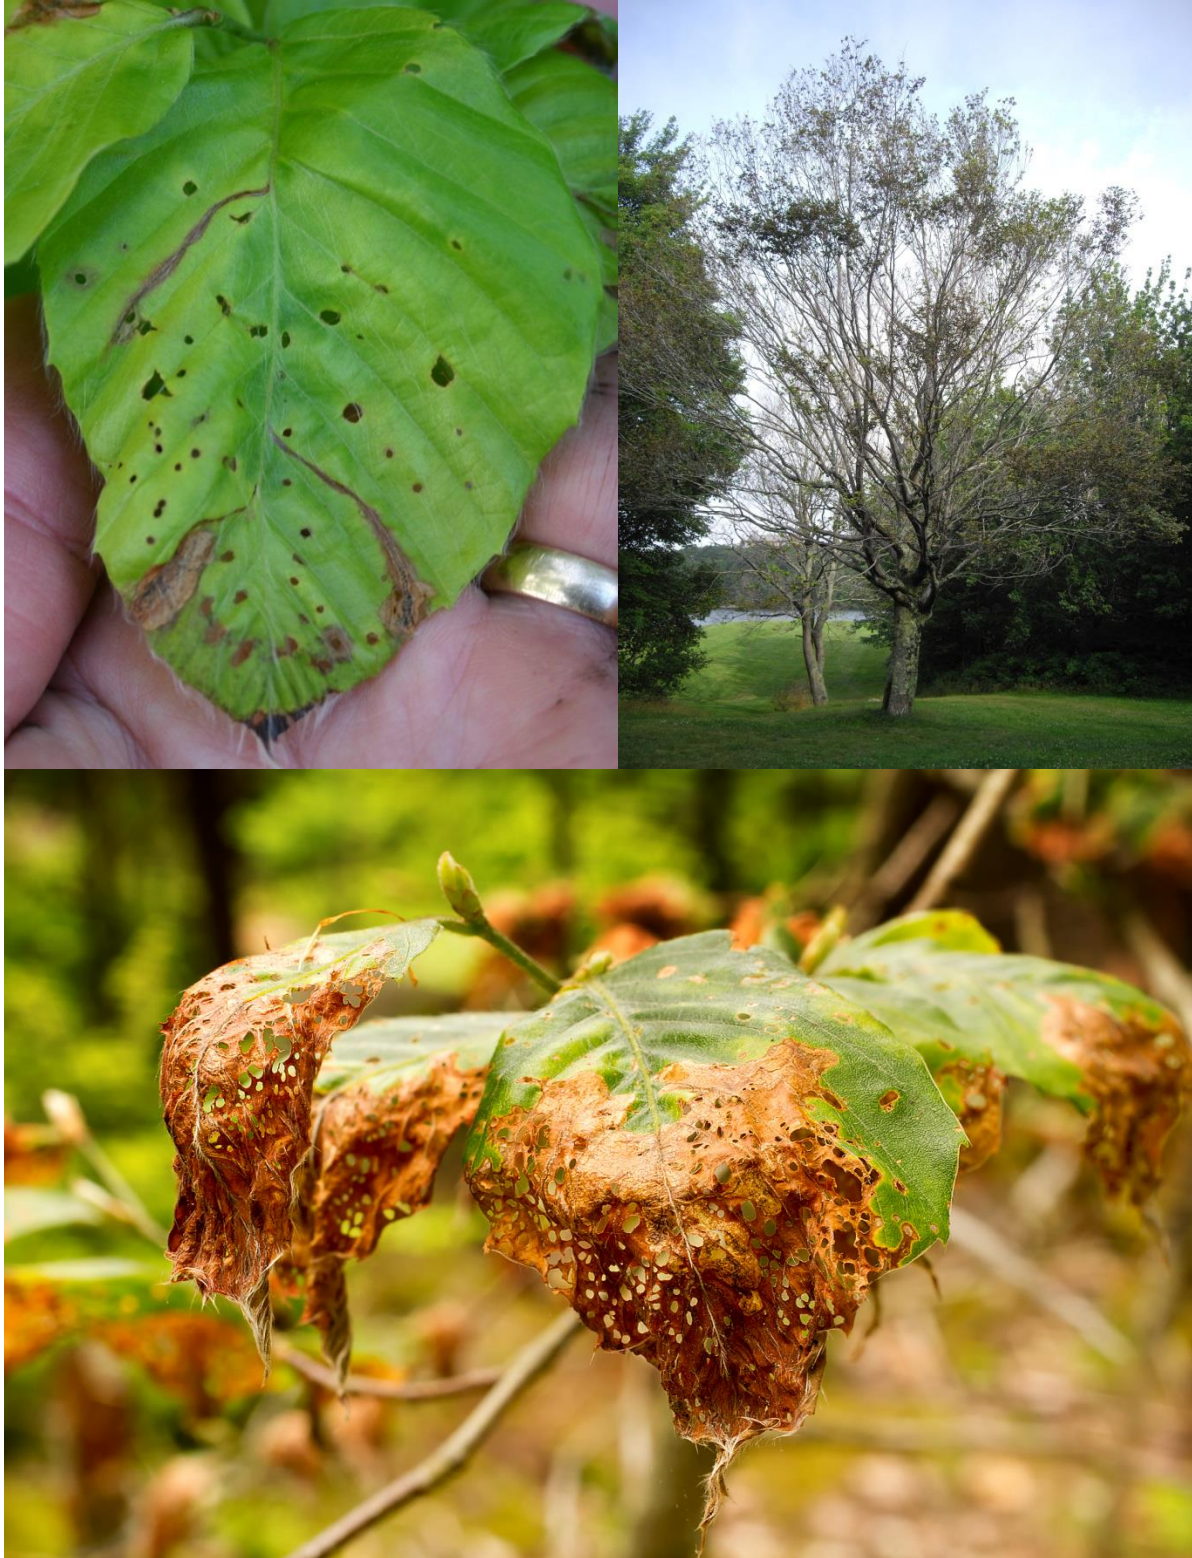

Damage to American beech by the beech leaf mining weevil: top left, typical mines made by larvae and shot holes made by adults; top right – mature beech with heavy damage by beech weevil; bottom: leaves damaged by heavy infestation of beech weevil – ends of leaves appear scorched.
