# Supplementary material
Source: Frontiers journal article supplement (https://www.frontiersin.org/articles/515086)
Supplement: Table_1.pdf [file Table_1.pdf]

Supplementary Material Table S1. Results of generalized linear model (binomial distribution, logit link, SAS PROC GLIMMIX, sites fixed) testing for differences among sites within years in the proportion of beech leaves with damage by *Orchestes fagi*. Branch samples were pooled to give one replicate per plot, five replicate (plots) per site. Leaf damage was not assessed in 2015.

| Year | Effect | Adult feeding |      |                   | Larval mines |      |                   | Beech mortality |      |                   |
|------|--------|---------------|------|-------------------|--------------|------|-------------------|-----------------|------|-------------------|
|      |        | <i>F</i>      | df   | <i>P</i>          | <i>F</i>     | df   | <i>P</i>          | <i>F</i>        | df   | <i>P</i>          |
| 2014 | site   | 10.8          | 1,8  | <b>0.0111</b>     | 1.57         | 1,8  | 0.25              | 5.8             | 2,12 | <b>0.0175</b>     |
| 2015 | site   | -             | -    | -                 | -            | -    | -                 | 37.5            | 2,12 | <b>&lt;0.0001</b> |
| 2016 | site   | 250           | 2,12 | <b>&lt;0.0001</b> | 107          | 2,12 | <b>&lt;0.0001</b> | 34.5            | 2,12 | <b>&lt;0.0001</b> |
| 2017 | site   | 67.8          | 1,8  | <b>&lt;0.0001</b> | 175          | 1,8  | <b>&lt;0.0001</b> | 30.8            | 2,12 | <b>&lt;0.0001</b> |
| 2018 | site   | 4.11          | 1,7  | 0.0823            | 3.74         | 1,7  | 0.0944            | 15.2            | 2,12 | <b>&lt;0.0001</b> |
| 2019 | site   | 90.3          | 1,8  | <b>&lt;0.0001</b> | 43.2         | 1,8  | <b>0.0002</b>     | 14.9            | 2,12 | <b>0.0005</b>     |
